# Supplementary material for: Screening for Preeclampsia and Fetal Growth Restriction in the First Trimester in Women without Chronic Hypertension
Source: MDPI journal article supplement (doi:10.3390/jcm12175582), 2023-08-27
Supplement: s1 [file s1]

**Table S1.** Correlations between first trimester biophysical and biochemical markers and selected perinatal parameters among groups at high risk for PE or FGR or those who developed PE or FGR.

| Group      | PE diagnosis n=19                |              | without PE n=855       |                        | FGR or SGA diagnosis n= 51    |                   | without FGR or SGA n=823 |                        |
|------------|----------------------------------|--------------|------------------------|------------------------|-------------------------------|-------------------|--------------------------|------------------------|
| Feature    | Birth week                       | Birth weight | Birth week             | Birth weight           | Birth week                    | Birth weight      | Birth week               | Birth weight           |
|            | R, p                             | R, p         | R, p                   | R, p                   | R, p                          | R, p              | R, p                     | R, p                   |
| MoM UtPI   | 0.37, 0.13                       | 0.17, 0.49   | <b>0.08, 0.03</b>      | -0.03, 0.4             | -0.06, 0.69                   | -0.17, 0.24       | <b>0.09, 0.009</b>       | -0.01, 0.87            |
| MoM PAPP-A | -0.25, 0.3                       | 0.14, 0.55   | 0.06, 0.08             | <b>0.15, &lt;0.001</b> | 0.21, 0.13                    | 0.22, 0.13        | 0.03, 0.4                | <b>0.13, &lt;0.001</b> |
| MoM PLGF   | -0.04, 0.88                      | -0.02, 0.94  | 0.02, 0.47             | <b>0.1, 0.004</b>      | 0.19, 0.19                    | 0.18, 0.21        | 0.01, 0.79               | 0.07, 0.051            |
| MoM MAP    | -0.41, 0.09                      | -0.29, 0.22  | 0.04, 0.32             | -0.03, 0.47            | 0.09, 0.54                    | 0.08, 0.58        | 0.01, 0.69               | -0.05, 0.15            |
| Group      | High risk for PE n= 35           |              | Low risk for PE n= 839 |                        | High risk for FGR n=74        |                   | Low risk for FGR n=800   |                        |
| Feature    | Birth week                       | Birth weight | Birth week             | Birth weight           | Birth week                    | Birth weight      | Birth week               | Birth weight           |
|            | R, p                             | R, p         | R, p                   | R, p                   | R, p                          | R, p              | R, p                     | R, p                   |
| MoM UtPI   | 0.01, 0.96                       | 0.11, 0.54   | 0.07, 0.051            | -0.03, 0.35            | 0.13, 0.3                     | 0.09, 0.47        | <b>0.08, 0.01</b>        | -0.01, 0.77            |
| MoM PAPP-A | 0.22, 0.21                       | 0.28, 0.11   | 0.05, 0.16             | <b>0.14, &lt;0.001</b> | 0.18, 0.1                     | <b>0.27, 0.02</b> | 0.04, 0.31               | <b>0.12, &lt;0.001</b> |
| MoM PLGF   | 0.1, 0.55                        | 0.07, 0.68   | 0.03, 0.39             | <b>0.09, 0.01</b>      | -0.04, 0.7                    | 0.04, 0.73        | 0.02, 0.61               | 0.06, 0.08             |
| MoM MAP    | 0.11, 0.52                       | - 0.04, 0.83 | 0.02, 0.57             | -0.03, 0.45            | -0.07, 0.57                   | -0.03, 0.78       | 0.03, 0.39               | -0.03, 0.46            |
| Group      | High risk for PE or/and FGR n=81 |              |                        |                        | Low risk for PE and FGR n=793 |                   |                          |                        |
| Feature    | Birth week                       |              | Birth weight           |                        | Birth week                    |                   | Birth weight             |                        |
|            | R, p                             |              | R, p                   |                        | R, p                          |                   | R, p                     |                        |
| MoM UtPI   | 0.11, 0.33                       |              | 0.08, 0.49             |                        | <b>0.08, 0.02</b>             |                   | -0.01, 0.71              |                        |
| MoM PAPP-A | 0.2, 0.08                        |              | <b>0.3, 0.006</b>      |                        | 0.04, 0.31                    |                   | <b>0.11, 0.001</b>       |                        |
| MoM PLGF   | -0.01, 0.9                       |              | 0.09, 0.43             |                        | 0.02, 0.59                    |                   | 0.06, 0.09               |                        |
| MoM MAP    | 0.001, 0.99                      |              | 0.06, 0.62             |                        | 0.03, 0.43                    |                   | -0.03, 0.4               |                        |

Note: PE: preeclampsia; FGR: fetal growth restriction; MoM: multiple of the median; UtPI: uterine artery pulsatility index; PAPP-A: Pregnancy Associated Plasma Protein-A; PLGF: placental growth factor;
